# Supplementary material for: A satellite-based ice fraction record for small water bodies of the Arctic Coastal Plain (2017 to 2023)
Source: Copernicus journal article supplement (doi:10.5194/essd-18-535-2026), 2026-01-21
Supplement: Supplementary file 1 [file essd-18-535-2026-supplement.pdf]

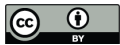

*Supplement of*

## **A satellite-based ice fraction record for small water bodies of the Arctic Coastal Plain (2017 to 2023)**

**Hong Lin et al.**

*Correspondence to:* Jinyang Du ([jinyang.du@ntsg.umd.edu](mailto:jinyang.du@ntsg.umd.edu)) and Xiao Cheng ([chengxiao9@mail.sysu.edu.cn](mailto:chengxiao9@mail.sysu.edu.cn))

The copyright of individual parts of the supplement might differ from the article licence.

## Supplementary figures

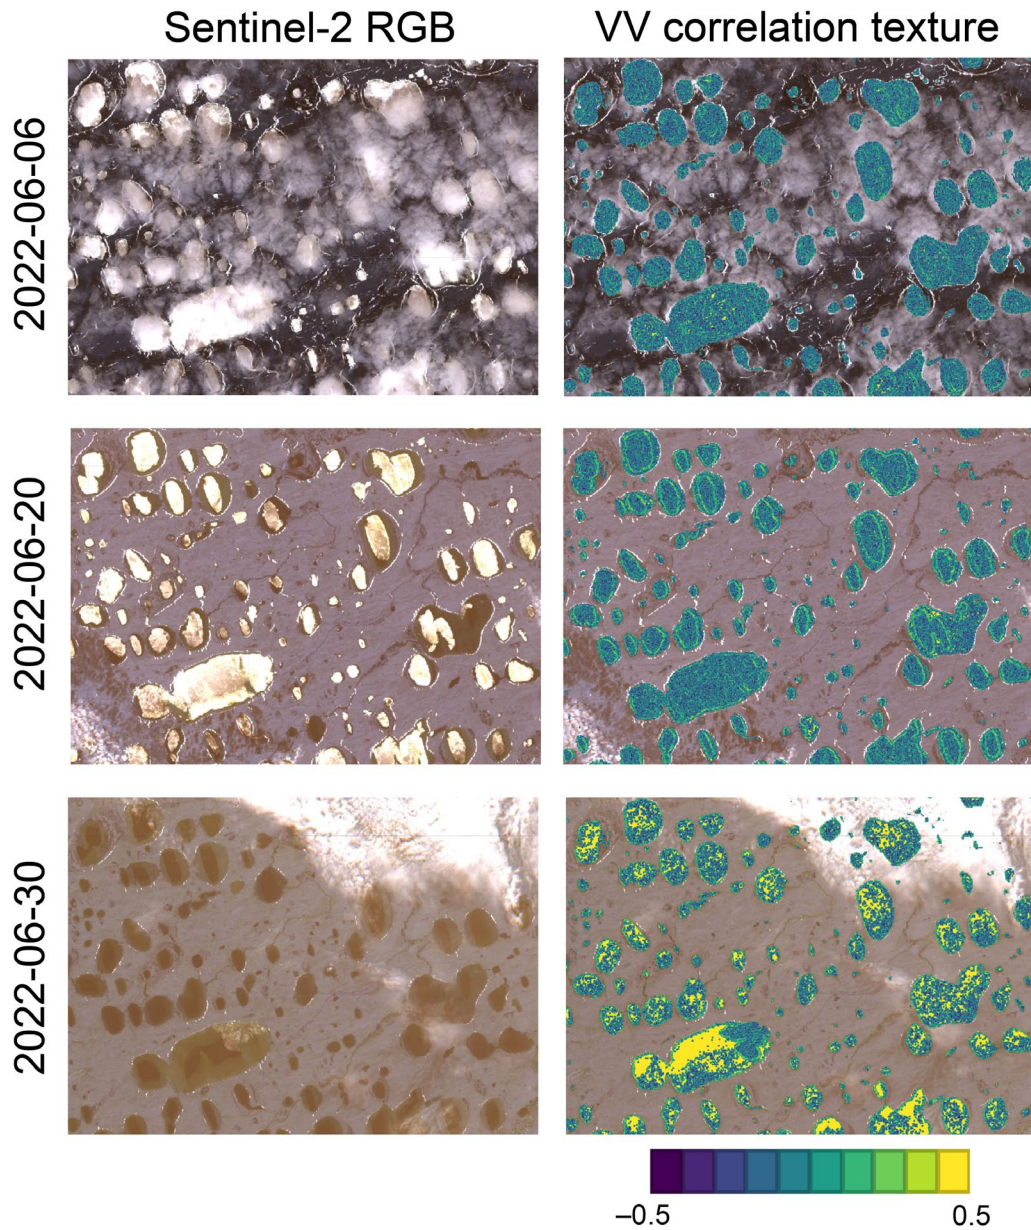

**Figure S1**

The texture derived from SAR imagery provides spatial information for distinguishing lake ice and open water, illustrated here using a selected area within the study region. The figure shows three stages of lake ice break-up: (1) the early stage (first row, 6 June 2022), (2) the rapid melt stage (second row, 20 June 2022), and (3) the late stage (third row, 30 June 2022). For each row, the two panels from left to right represent the Sentinel-2 RGB image, and the correlation texture computed from the VV band.

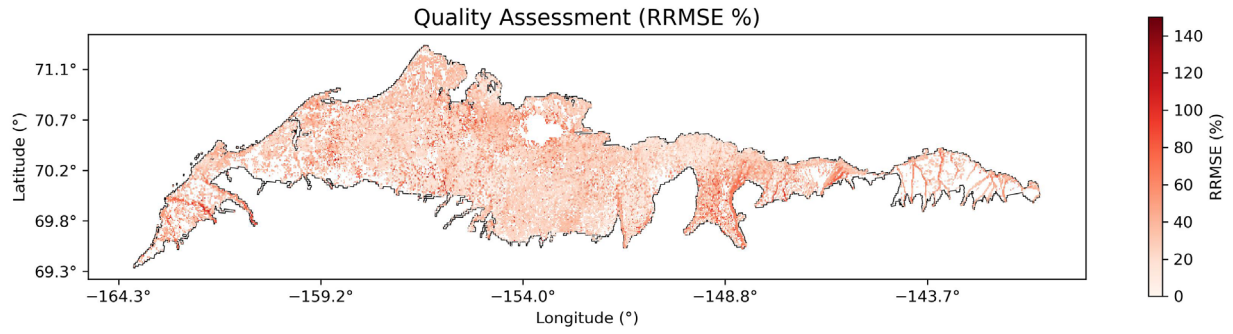

**Figure S2**

The quality layer of the S1 ice fraction product in this study shows that the areas with larger errors are mainly located along rivers and their surrounding regions, as well as in very small lakes and ponds within the study area. The quality layer provides an evaluation of the ice fraction quality for each 1-km grid cell, where each cell's value represents the Relative Root Mean Square Error (RRMSE) between all same-day Sentinel-1 and Dynamic World ice fraction data pairs during the study period (2017–2023), expressed in percentage (%).

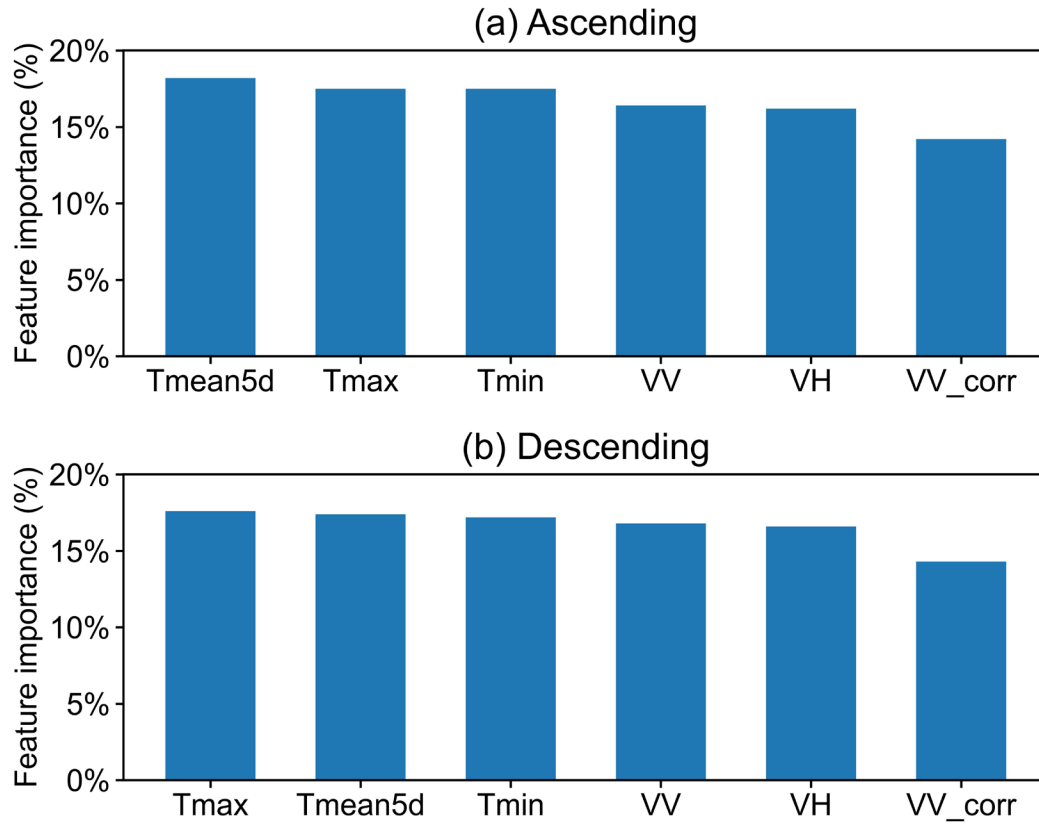

**Figure S3**

Feature importance of the random forest classifiers trained with ascending-pass data (a) and descending-pass data (b).

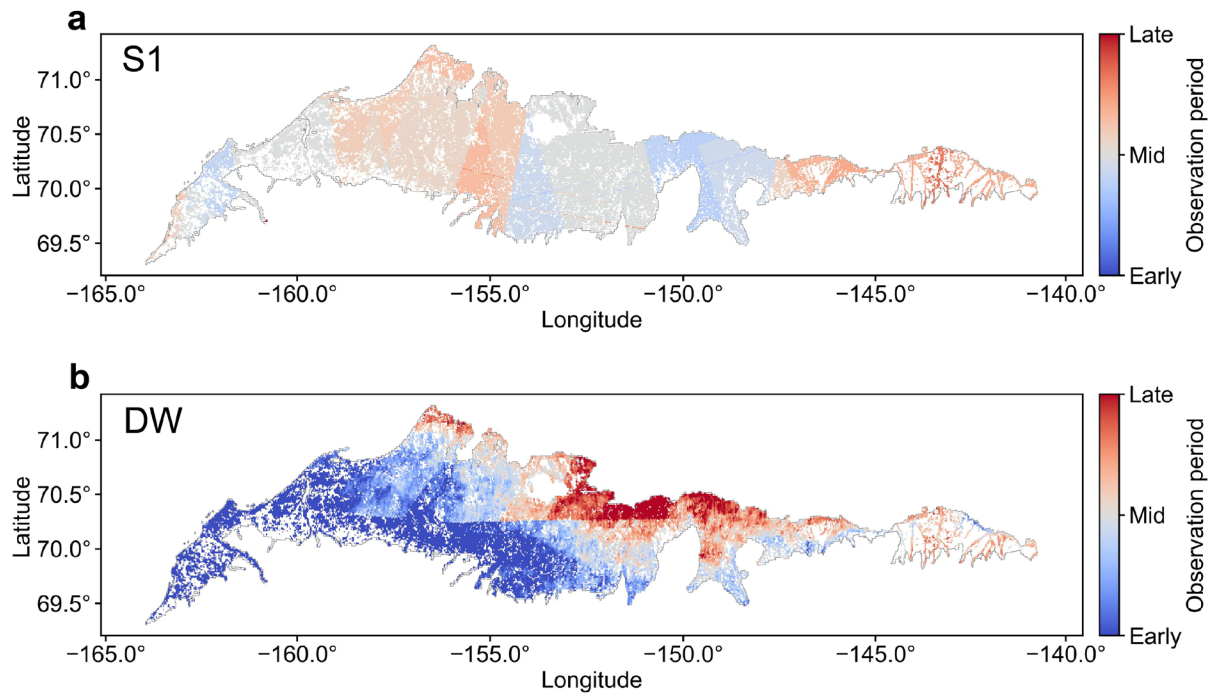

**Figure S4**

Observation timing of Sentinel-1 (S1) (a) and Dynamic World (DW) (b) in June from 2017–2023. Observations from June 1–10 are classified as Early, June 11–20 as Mid, and June 21–30 as Late.

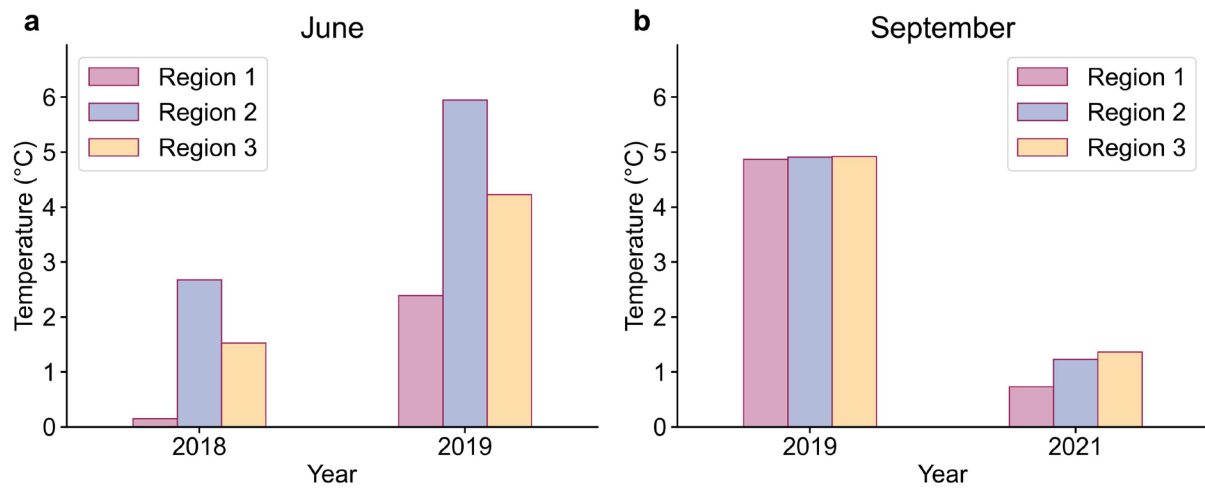

**Figure S5**

The mean temperature in June 2019 was higher than in June 2018 across the three selected regions (a), while the mean temperature in September 2021 was significantly lower than in September 2019 (b). Temperature data are derived from daily temperature records in the Daymet dataset.

## Supplementary tables

**Table S1**

Comparison between observed ice phenology data and satellite-based estimated phenology dates. The table presents seven observed ice phenology records from four rivers, including the site name, location, event type, and the observed date. It also includes phenology dates estimated from the 1-km Sentinel-1 (S1) and Dynamic World (DW) ice fraction data, along with the date errors calculated as the difference between the estimated and observed dates.

| Site name                           | Lat   | Lon     | Event     | Observed<br>date | Estimated date |          | Date error |     |
|-------------------------------------|-------|---------|-----------|------------------|----------------|----------|------------|-----|
|                                     |       |         |           |                  | S1             | DW       | S1         | DW  |
| Colville River<br>(ColvilleVillage) | 70.43 | -150.39 | Freeze-up | 20171015         | 20170926       | 20170927 | -19        | 18  |
| Colville River<br>(ColvilleVillage) | 70.43 | -150.39 | Break-up  | 20180605         | 20180611       | 20180622 | 6          | 17  |
| Colville River<br>(ColvilleVillage) | 70.43 | -150.39 | Freeze-up | 20181009         | 20181015       | 20180920 | 6          | -19 |
| Colville River<br>(ColvilleVillage) | 70.43 | -150.39 | Break-up  | 20190527         | 20190519       | 20190522 | -8         | -5  |
| Kuparuk River<br>(Kuparuk)          | 70.33 | -149.01 | Break-up  | 20180605         | 20180605       | 20180713 | 0          | 38  |
| Meade River<br>(Atqasuk)            | 70.49 | -157.41 | Break-up  | 20210530         | 20210524       | 20210615 | -6         | 16  |
| Sagavanirktok<br>River (Deadhorse)  | 70.25 | -148.31 | Break-up  | 20210524         | 20210522       | 20210609 | -2         | 16  |

**Table S2**

Training and testing data used in the random forest models.

| Orbit type | Training data |         | Testing data |         | Total  |
|------------|---------------|---------|--------------|---------|--------|
|            | Ice           | Non-Ice | Ice          | Non-Ice |        |
| Ascending  | 9083          | 6174    | 2383         | 1484    | 19,124 |
| Descending | 16,184        | 10,032  | 3929         | 2589    | 32,734 |

**Table S3**

Hyperparameter settings for the random forest classifiers (ice detection models).

| Hyperparameter          | Ascending | Descending |
|-------------------------|-----------|------------|
| Number of trees         | 50        | 50         |
| Variables per split     | 2         | 3          |
| Minimum leaf population | 1         | 1          |
| Bag fraction            | 0.5       | 0.5        |
| Maximum nodes           | 2010      | 2010       |

**Table S4**

Comparison of 1-km S1 and DW ice fraction on the same days each year from 2017 to 2023. The table lists the  $R$ , RMSE, RRMSE, and bias values, as well as the number of matched S1 and DW dates for each year and the total number of data points per year.

| Year | $R$  | RMSE | RRMSE | Bias  | Dates | Points  |
|------|------|------|-------|-------|-------|---------|
| 2017 | 0.90 | 0.21 | 0.38  | 0.05  | 61    | 54,057  |
| 2018 | 0.88 | 0.22 | 0.31  | 0.04  | 127   | 152,963 |
| 2019 | 0.94 | 0.16 | 0.23  | 0.03  | 126   | 140,814 |
| 2020 | 0.92 | 0.19 | 0.38  | 0.04  | 122   | 185,053 |
| 2021 | 0.94 | 0.13 | 0.16  | 0     | 121   | 151,235 |
| 2022 | 0.86 | 0.22 | 0.32  | −0.02 | 97    | 95,325  |
| 2023 | 0.92 | 0.18 | 0.29  | −0.02 | 100   | 87,791  |
